# Supplementary material for: Pulmonary fibrosis in critically ill patients with COVID-19: A multi-center retrospective cohort study in South Korea
Source: Research Square preprint supplement (doi:10.21203/rs.3.rs-3952351/v1), 2024-02-16

**Table S1. Comparison of clinical findings at intensive care unit admission** **between the pulmonary fibrosis and no pulmonary fibrosis groups**

|  | All patients | PF group | No PF group | *P* value |
| --- | --- | --- | --- | --- |
| Number of patients | 125 | 94 | 31 |  |
| Systolic BP, mmHg | 130.8 ± 26.1 | 132.4 ± 24.1 | 125.7 ± 31.1 | 0.214 |
| Diastolic BP, mmHg | 72.4 ± 17.7 | 71.2 ± 16.7 | 70.2 ± 20.4 | 0.418 |
| Heart rate, /min | 88.4 ± 18.8 | 85.6 ± 18.5 | 97.5 ± 17.2 | 0.001 |
| Respiratory rate, /min | 24.6 ± 6.6 | 23.1 ± 6.5 | 25.1 ± 7.0 | 0.739 |
| P/F ratio | 113.0 ± 54.6 | 112.8 ± 53.2 | 113.8 ± 59.7 | 0.699 |
| SOFA score | 5.0 ± 2.8 | 4.2 ± 2.7 | 5.9 ± 3.1 | 0.048 |
| APACHE score | 14.8 ± 7.9 | 13.1 ± 7.6 | 15.0 ± 8.7 | 0.997 |
| Leukocyte, ×103/Ul | 10.4 ± 6.5 | 8.9 ± 6.7 | 11.1 ± 6.1 | 0.237 |
| Lymphocyte % | 9.8 ± 8.8 | 10.0 ± 9.5 | 9.1 ± 6.3 | 0.991 |
| Neutrophil % | 84.2 ± 11.1 | 84.5 ± 11.3 | 83.2 ± 10.3 | 0.339 |
| NLR | 16.9 ± 19.2 | 15.9 ± 14.0 | 19.9 ± 30.2 | 0.825 |
| ANC /uL | 9136.2 ± 6205.7 | 9017.2 ± 6417.7 | 9493.3 ± 5604.9 | 0.345 |
| Hemoglobin g/dL | 12.4 ± 1.9 | 12.4 ± 1.9 | 12.5 ± 2.2 | 0.771 |
| Platelet, ×103/uL | 202.3 ± 103.3 | 200.6 ± 88.3 | 207.6 ± 140.8 | 0.806 |
| AST IU/L | 54.7 ± 33.9 | 51.9 ± 34.0 | 63.0 ± 32.4 | 0.023 |
| ALT IU/L | 41.4 ± 32.5 | 39.4 ± 30.3 | 47.3 ± 38.3 | 0.464 |
| Total bilirubin, mg/dL | 0.6 ± 0.4 | 0.6 ± 0.3 | 0.7 ± 0.4 | 0.089 |
| Total protein, g/dL | 5.9 ± 0.7 | 5.9 ± 0.6 | 6.0 ± 1.0 | 0.838 |
| Albumin, g/dL | 3.0 ± 0.4 | 3.0 ± 0.4 | 3.0 ± 0.5 | 0.746 |
| BUN, mg/dL | 25.3 ± 17.3 | 24.2 ± 17.7 | 28.6 ± 15.9 | 0.083 |
| Creatinine, mg/dL | 1.1 ± 0.9 | 1.1 ± 1.0 | 1.2 ± 0.7 | 0.104 |
| Sodium, mmol/L | 137.1 ± 4.8 | 136.9 ± 4.1 | 137.9 ± 6.4 | 0.390 |
| Potassium mmol/L | 4.0 ± 0.7 | 4.0 ± 0.6 | 4.0 ± 0.7 | 0.557 |
| Total CO2 mmol/L | 22.9 ± 8.6 | 22.0 ± 4.0 | 25.6 ± 15.6 | 0.340 |
| LDH, IU/L | 586.6 ± 271.1 | 559.9 ± 230.9 | 663.8 ± 357.3 | 0.159 |
| CRP, mg/dL | 11.1 ± 7.9 | 11.1 ± 8.9 | 11.2 ± 6.7 | 0.621 |
| Procalcitonin, ng/mL | 0.8 ± 2.0 | 0.8 ± 2.2 | 0.7 ± 1.0 | 0.171 |
| PT, sec | 14.1 ± 3.9 | 14.1 ± 4.3 | 14.1 ± 2.2 | 0.439 |
| aPTT, sec | 40.6 ± 34.9 | 39.9 ± 37.0 | 42.9 ± 28.0 | 0.081 |
| Fibrinogen, mg/dL | 565.4 ± 158.4 | 565.0 ± 146.2 | 566.5 ± 193.8 | 0.937 |
| Ferritin, ng/mL | 886.5 ± 801.6 | 751.8 ± 540.4 | 1210.0 ± 1177.9 | 0.231 |

Data are presented as mean ± standard deviation or number (%), unless otherwise stated. *Abbreviations*: ALT: alanine transaminase, ANC: absolute neutrophil count, AST: aspartate transaminase, CRP: C-reactive protein, LDH: lactate dehydrogenase, NLR: Neutrophil-to-lymphocyte ratio, P/F ratio: PaO2/FiO2 ratio

**Table S2. Comparison of treatment between PF and no PF groups**

|  | **All patients** | **PF group** | **No PF group** | ***P* value** |
| --- | --- | --- | --- | --- |
| Number of patients | 125 | 94 | 31 |  |
| Ventilator mode |  |  |  | 0.136 |
| Pressure control | 58 (47.2) | 44 (47.8) | 14 (45.2) |  |
| Volume control | 50 (40.7) | 34 (37.0) | 16 (51.6) |  |
| Pressure/Volume control | 15 (12.2) | 14 (15.2) | 1 (3.2) |  |
| Respiratory rate /min | 23.1 ± 3.9 | 23.3 ± 3.8 | 22.5 ± 4.1 |  |
| Tidal volume / PBW mL/kg | 6.7 ± 1.5 | 6.7 ± 1.5 | 6.7 ± 1.4 | 0.359 |
| Minute ventilation | 9.5 ± 2.6 | 9.6 ± 2.5 | 9.3 ± 2.6 | 0.672 |
| Peak pressure | 24.6 ± 4.0 | 24.6 ± 3.9 | 24.8 ± 4.5 | 0.630 |
| PEEP | 10.2 ± 2.4 | 10.1 ± 2.3 | 10.3 ± 2.8 | 0.884 |
| Duration of mechanical ventilation | 29.3 ± 28.4 | 28.1 ± 29.6 | 32.7 ± 24.5 | 0.096 |
| Use of anti-viral agents | 93 (74.4) | 72 (76.6) | 21 (67.7) | 0.327 |
| Anti-viral agents |  |  |  | 0.031 |
| Remdesivir | 81 (87.1) | 63 (87.5) | 18 (58.7) |  |
| Lopinavir/Ritonavir | 8 (15.4) | 8 (11.1) | 0 (0.0) |  |
| Others | 4 (7.7) | 1 (1.4) | 3 (14.3) |  |
| Use of Steroid | 118 (94.4) | 89 (94.7) | 29 (93.5) | 0.812 |
| Steroid |  |  |  | 0.554 |
| Dexamethasone | 78 (66.7) | 61 (69.3) | 17 (58.6) |  |
| Methylprednisolone | 27 (23.1) | 18 (20.5) | 9 (31.0) |  |
| Prednisolone | 3 (2.6) | 2 (2.3) | 1 (3.4) |  |
| Hydrocortisone | 9 (7.7) | 7 (8.0) | 2 (6.9) |  |
| Steroid duration, days | 7.5 ± 7.7 | 7.3 ± 5.6 | 8.0 ± 12.1 | 0.532 |
| Steroid dose per day mg† | 11.1 ± 15.6 | 8.8 ± 7.4 | 18.1 ± 27.7 | 0.452 |
| Steroid total dose mg† | 72.6 ± 138.2 | 72.3 ± 153.8 | 73.3 ± 76.0 | 0.412 |
| Use of antibiotics | 125 (100.0) | 94 (100.0) | 31 (100.0) |  |
| Use of NMB | 104 (84.6) | 79 (84.9) | 25 (83.3) | 0.779 |
| NO inhalation | 7 (5.6) | 6 (6.4) | 1 (3.2) | 0.680 |
| Prone position | 45 (36.0) | 33 (35.1) | 12 (38.7) | 0.717 |
| Prone position duration days | 5.3 ± 6.6 | 5.0 ± 15.8 | 6.1 ± 11.4 | 0.450 |
| CRRT | 24 (19.2) | 16 (17.0) | 8 (25.8) | 0.282 |
| CRRT duration days | 25.1 ± 22.0 | 26.9 ± 26.0 | 21.6 ± 11.1 | 0.593 |
| ECMO | 17 (13.6) | 14 (14.9) | 3 (9.7) | 0.463 |
| ECMO duration days | 31.4 ± 25.8 | 34.7 ± 27.2 | 15.7 ± 8.1 | 0.244 |

Data are presented as mean ± SD or number (%), unless otherwise stated.

† Dose based on dexamethasone or equivalent drugs. *Abbreviations*: CRRT: continuous renal replacement therapy, ECMO: extracorporeal membrane oxygenation, NMB: Neuromuscular blocker , NO inhalation: nitric oxide inhalation, PBW: predicted body weight, PEEP: positive end expiratory pressure

**Figure S1. Fibrotic-like changes detected on computed tomography scans**

A. Reticulation (red arrows), B. Architectural distortion (white arrows) and/or parenchymal band (red arrows), C. Traction bronchiectasis (red arrows) and/or bronchiolectasis, D. Honeycombing (red arrows)


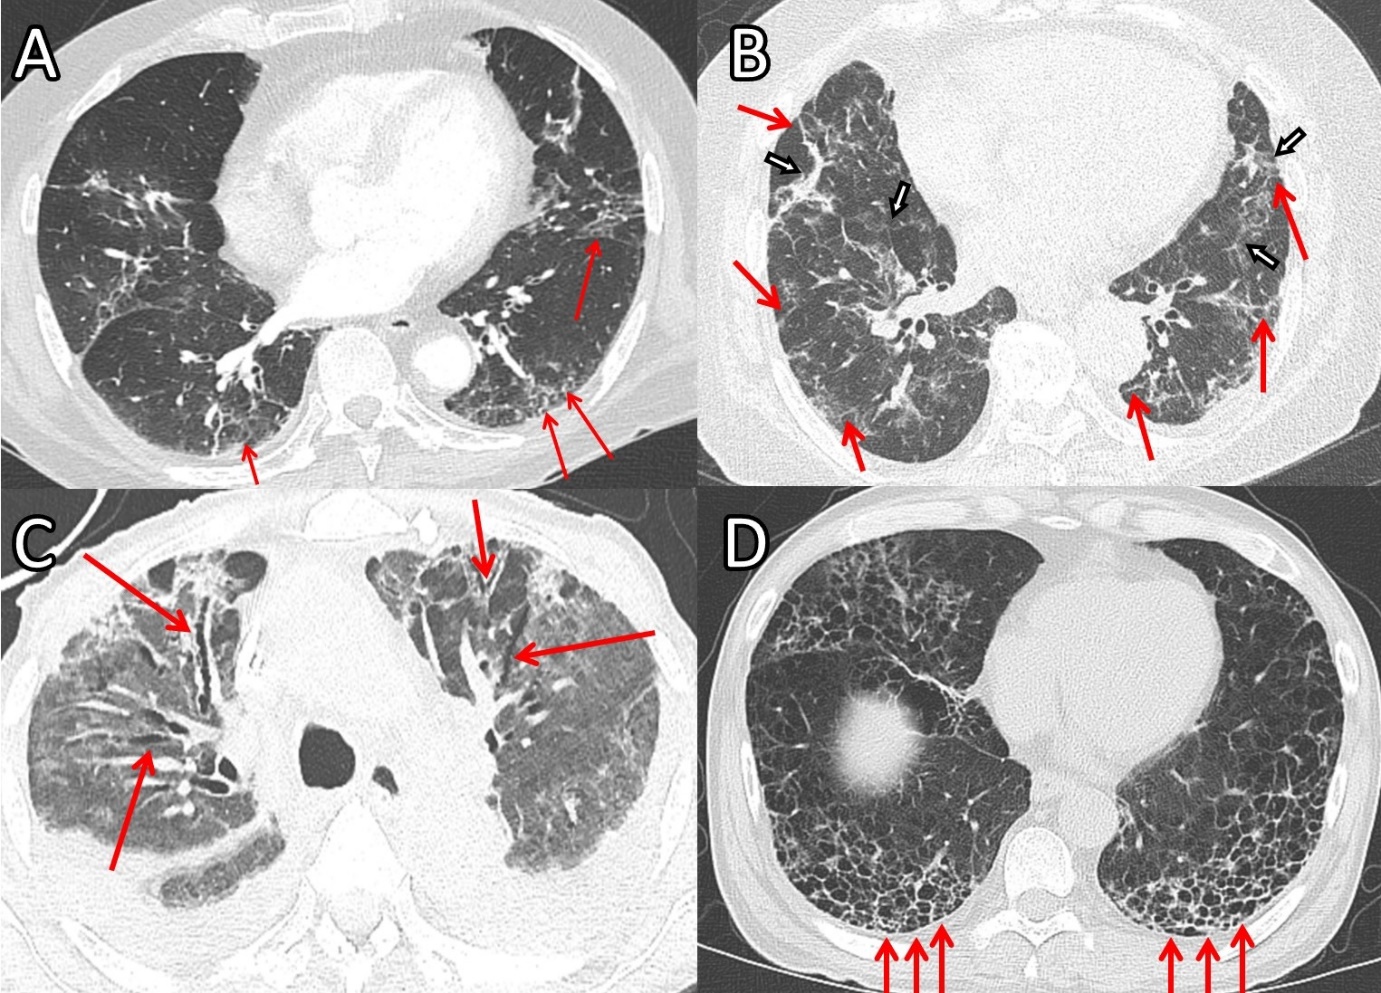

Supplement: Supplementary file 1 [file 85ff2a136a3dd7395236d06c.docx]
